1 **Association between Cognitive Function and Large Optic Nerve Cupping,**  
2 **Accounting for Cup-Disc-Ratio Genetic Risk Score**

3 **Short Title: Cup-disc-ratio genetic risk score and cognitive function**

4 Sasha Kravets<sup>1,2</sup>, Rawan Allozi Rupnow<sup>1,2</sup>, Abhishek Sethi<sup>1,3</sup>, Mark A. Espeland<sup>4</sup>, Louis  
5 R. Pasquale<sup>5</sup>, Stephen R. Rapp<sup>6</sup>, Barbara E. Klein<sup>7</sup>, Stacy M. Meuer<sup>7</sup>, Mary N. Haan<sup>8</sup>,  
6 Pauline M. Maki<sup>9</sup>, Joelle A. Hallak<sup>1\*</sup>, Thasarat Sutabutr Vajaranant<sup>1\*</sup>

7 1. Illinois Eye and Ear Infirmary, Department of Ophthalmology and Visual Sciences,  
8 University of Illinois at Chicago, Chicago, Illinois, USA.

9 2. Division of Epidemiology and Biostatistics, School of Public Health, University of  
10 Illinois at Chicago, Chicago IL

11 3. Department of Medicine, University of Illinois at Chicago, Chicago, IL

12 4. Departments of Internal Medicine and Biostatistics and Data Science, Wake Forest  
13 University Health Sciences, Winston Salem, North Carolina, USA.

14 5. Department of Ophthalmology, Icahn School of Medicine at Mount Sinai, New York,  
15 New York, USA.

16 6. Psychiatry and Behavioral Medicine, Wake Forest University Health Sciences,  
17 Winston Salem, North Carolina, USA.

18 7. Department of Ophthalmology and Visual Sciences, University of Wisconsin,  
19 Madison, Wisconsin, USA.

20 8. Department of Epidemiology and Biostatistics, University of California at San  
21 Francisco, San Francisco, California, USA.

22 9. Department of Psychiatry, University of Illinois at Chicago, Chicago, Illinois, USA.

23 \*Dr. Hallak and Dr. Vajaranant contributed equally as co-senior authors

24 **Meeting Presentations:** Presented at ARVO 2021

25 **Corresponding authors:**

26 Thasarat Sutabutr Vajaranant, MD, MHA

27 e-mail: [thasarat@uic.edu](mailto:thasarat@uic.edu)

28 Joelle A. Hallak, MS, PhD

29 e-mail: [joelle@uic.edu](mailto:joelle@uic.edu)

30

31

32

33

34

35

36

37

38

## 39 **Abstract**

40 **Purpose:** To investigate if accounting for a cup-to-disc ratio (CDR) genetic risk  
41 score (GRS) modified the association between large CDR and cognitive function among  
42 women.

43 **Design:** This was a retrospective study using data from the Women's Health  
44 Initiative.

45 **Methods:** Patients with glaucoma or ocular hypertension were excluded. Large CDR  
46 was defined as  $\geq 0.6$  in either eye. Cognitive function was measured by the Modified  
47 Mini-Mental State Examination (3MSE). We used the combined effects from 13 single  
48 nucleotide polymorphisms (SNPs) to formulate the GRS for CDR. We used logistic  
49 regression to investigate associations between weighted GRS and large CDR, then a  
50 linear regression to assess the association between weighted GRS and 3MSE scores,  
51 and between weighted GRS, CDR, and 3MSE scores, adjusted for demographic and  
52 clinical characteristics.

53 **Results:** Final analyses included 1,196 White women with mean age of  $69.60 \pm 3.62$   
54 years and 7.27% with large CDR. Mean GRS in women with and without large CDR  
55 was  $1.51 \pm 0.31$  vs.  $1.41 \pm 0.36$ , respectively ( $p = 0.004$ ). The odds of large CDR for a  
56 one unit increase in GRS was 2.30 (95% CI: (1.22, 4.36),  $p = 0.011$ ). Adding the CDR  
57 GRS in the model with CDR and 3MSE, women with large CDR still had statistically

58 significantly lower 3MSE scores than those without large CDR, yielding a predicted  
59 mean difference in 3MSE scores of 0.84 ( $p = 0.007$ ).

60 **Conclusions:** Independent of the CDR GRS, women with large CDR had a lower  
61 cognitive function.

62

63

## 64 Introduction

65 Glaucoma, currently affecting more than 70 million individuals worldwide, is the leading  
66 cause of irreversible blindness.<sup>1</sup> While its pathogenesis is still poorly understood, older  
67 age and elevated intraocular pressure (IOP) are considered to be important risk  
68 factors.<sup>2-3</sup> Glaucoma progression can also occur in patients with normal range IOP,  
69 suggesting that other risk factors may be involved in its pathogenesis.<sup>4</sup> One candidate  
70 risk factor is neurodegeneration of the optic nerve and retinal ganglion cells that occurs  
71 with normal aging and diseases such as Alzheimer's disease (AD), which is a leading  
72 cause of dementia worldwide.<sup>5</sup>

73         Several studies have supported a connection between primary open-angle  
74 glaucoma (POAG) and AD. Epidemiological studies have shown a higher prevalence of  
75 glaucoma among AD patients.<sup>6-7</sup> Visual difficulties, such as in reading and finding  
76 objects, altered depth and color perception, impaired spatial contrast sensitivity or  
77 difficulties in perceiving structure from motion have also been noted in AD patients.<sup>8</sup> In  
78 addition, Optical Coherence Tomography (OCT) studies in AD patients show  
79 preferential retinal nerve fiber layer (RNFL) thinning in the superior quadrant of the optic  
80 nerve which has a preponderance of large axons, resembling a pattern seen in  
81 glaucomatous eyes.<sup>9-10</sup> Degeneration of the optic nerve leads to cupping, which can be  
82 quantified by cup-to-disc ratio (CDR) and which serves as a biomarker for  
83 glaucomatous neuropathy. We previously reported that a large CDR (i.e., greater or  
84 equal to 0.6) was associated with lower cognitive function, in White post-menopausal  
85 women aged 65 years and older without glaucoma or ocular hypertension.<sup>11</sup>

86 Previous Genome Wide Association Studies (GWAS), including a genome-wide  
87 meta-analysis, have identified multiple loci associated with vertical CDR.<sup>12</sup> While  
88 multiple loci have been identified, individually each loci provides limited information. For  
89 this reason, a genetic risk score (GRS), combining information from multiple genetic  
90 variants into a single measure, has been used to study the genetic risk factors for  
91 POAG as well as vertical CDR. Furthermore, previous studies have shown that genetic  
92 variants can vary across racial groups. To account for these variations, in our study, we  
93 focused on White patients, specifically elderly White women aged 65 years and older.

94 In this study, our goals were to (1) develop a GRS for CDR and (2) determine if the  
95 GRS modified the previously identified relationship between large CDR and decreased  
96 cognitive function in cognitively intact women aged 65 years and older presenting  
97 without glaucoma or ocular hypertension. This work provides insight into the possible  
98 connections between genetics and neurodegenerative changes of the optic nerve and  
99 brain.

## 100 **Materials & Methods**

101 The Institutional Review Board at the University of Illinois at Chicago waived IRB  
102 approval for this secondary data analysis of de-identified data from the WHI. This study  
103 adhered to the Declaration of Helsinki and all federal and state laws.

## 104 **Data Source**

105 The Women's Health Initiative (WHI) is a series of clinical trials and observational  
106 studies funded by the National Heart, Lung, and Blood Institute from 1991 planned

107 through 2027. The original WHI study, starting in 1991, enrolled over 68,000  
108 postmenopausal women between the ages of 50 and 79 and was split into three  
109 separate double blinded randomized control trials. The trials investigated the effects of  
110 hormone therapy, dietary modification, and calcium and vitamin D supplements for  
111 prevention of heart disease, osteoporosis and its related effects, and associated risks  
112 for breast and colorectal cancer. Participants in the trials were stratified by hysterectomy  
113 status: with a uterus versus without a uterus. Those with a uterus were randomized to  
114 either placebo or estrogen plus progestin, and those without a uterus were randomized  
115 to either placebo or estrogen-alone. The WHI trial is registered at  
116 <https://www.clinicaltrials.gov> (NCT00000611).

117 Within the WHI Hormone Therapy trials, we obtained data from two ancillary studies:  
118 the WHI-Sight Exam (WHISE), conducted from 2000 to 2002, and the WHI Memory  
119 Study (WHIMS), conducted between 1996 and 2007. The WHISE study recruited  
120 participants approximately five years after the randomization into the WHI hormone trial.  
121 The goal of this study was to investigate the effect of hormone therapy on age-related  
122 macular degeneration. Overall, 4,347 participants consented and completed enrollment  
123 with fundus photographs of at least one eye available. To determine CDR, the outer  
124 edges of the vertical margin of the optic disc and cup were compared with a series of  
125 cup-to-disc standards of increasing size. If the ratio fell between 2 standards the smaller  
126 ratio was chosen. Within the WHISE study, vertical CDR was classified as a binary  
127 variable, where large CDR was defined as  $CDR \geq 0.6$  in at least one eye. The WHIMS  
128 study investigated the relationship between the effects of hormone therapy and the  
129 development and progression of memory loss in women. Participants underwent a

130 baseline global cognitive function test that was repeated annually for ten years. Global  
131 cognitive function was assessed by the Modified Mini-Mental State Examination (3MSE)  
132 scores. 3MSE scores ranged from 0 to 100, where higher scores indicated better  
133 cognitive function.

134 Within the WHI, genetic data was available from the WHI harmonized and imputed  
135 data, which combined genetic data from six genome wide association studies (GWASs)  
136 within the WHI Clinical Trials and Observational Studies. The harmonization of over  
137 30,000 samples involved alignment to the same reference panel, imputation to 1000  
138 genomes, identity by descent (IBD) analysis for identification of genetically related  
139 individuals, and principal component analysis (PCA) for comparison with self-reported  
140 ethnicity. Genotypic quality control (QC) was performed by study and included  
141 evaluation of minimal sample call rate, minimal SNP call rate, Hardy-Weinberg  
142 equilibrium, and minor allele frequencies. Details regarding QC, harmonization, and  
143 imputation of the genetic data can be found from dbGaP at  
144 <http://www.ncbi.nlm.nih.gov/sites/entrez?db=gap> through dbGaP accession  
145 phs000746.v2.p3.

## 146 **Sample Selection**

147 Participants were selected for analysis if they were included in the WHISE or WHIMS  
148 studies, and had genetic data within the harmonized imputation dataset. The  
149 harmonized imputation dataset contains 3,111 genetic samples for 2,708 participants of  
150 the WHISE study. The majority, 2,339 out of the 2,708 (86%) self-identified as White.  
151 Additionally, 12 Black or African American participants, 0 Hispanic/Latino, and 5 other



152 race participants had large CDR. While there were cognitive differences between White  
153 vs non-White (mean  $\pm$  SD 3MSE score of  $96.94 \pm 3.33$  vs  $93.17 \pm 6.43$ ,  $p$ -value $<0.001$ ,  
154 respectively), given the small distribution of CDR among non-White participants, and  
155 that SNPs were only available for participants of European ancestry, the study was  
156 limited to White participants. For White subjects with duplicate samples, we included the  
157 genetic sample from the GWAS platform with a larger number of SNPs available. We  
158 identified three pairs of first-degree relatives and removed the subjects with genetic data  
159 from the smaller GWAS platform. Furthermore, 28 subjects had missing PCA data or  
160 CDR status. We did not identify inconsistent ethnicity from self-reported ethnicity among  
161 subjects with PCA data. After merging the 2,336 patients with genetic information with  
162 data from WHISE and WHIMS, 1,196 independent WHISE subjects from the WHI  
163 Harmonized Imputation dataset were included in the final analysis. The study schema is  
164 depicted in Figure 1.

165 **Fig 1. Schema: diagram of analysis of patient population**

## 166 **Cup-Disc Ratio Genetic Risk Score**

167 We selected 18 candidate single nucleotide polymorphisms (SNPs) associated with  
168 vertical CDR in White patients by a meta-analysis reported in Springelkamp et al.<sup>12</sup>  
169 Imputation quality was assessed by  $R^2$ , where  $R^2$  is the estimated value of the squared  
170 correlation between imputed genotypes and true, unobserved genotypes. The  
171 imputation quality for rs1345 (chromosome 11, build 37 position 65337251) in one study  
172 was low ( $R^2=0.56$ ). The remaining 17 out of the 18 SNPs had high imputation quality  
173 ( $R^2 > 0.89$ ) across all studies (Table 1). For the 17 high imputation quality SNPs, we

174 performed a logistic regression between large CDR and each SNP under the  
175 assumption of an additive model for the effect of the risk allele adjusted for age and the  
176 first two principal components (PC-1 and PC-2). There was concordance on the risk  
177 allele for 13 out of the 17 SNPs as reported by Springelkamp et al. These 13 SNPs  
178 were used to formulate the CDR GRS (Table 2).

179 **Table 1. 18 candidate SNPs associated with vertical cup-to-disc ratio**

| <b>RS</b>  | <b>CHR:POS</b> | <b>GENE</b> | <b>SPRINGELKAMP<br/>VCDR RISK<br/>ALLELE</b> | <b>WHISE<br/>BINARY<br/>LARGE CDR<br/>RISK ALLELE</b> |
|------------|----------------|-------------|----------------------------------------------|-------------------------------------------------------|
| rs4658101  | 1:92077409     | CDC7/TGFBR3 | A                                            | A                                                     |
| rs2623325  | 3:99131755     | COL8A1      | A                                            | A                                                     |
| rs17658229 | 5:172191052    | DUSP1       | T                                            | C                                                     |
| rs17756712 | 6:625071       | EXOC2       | G                                            | A                                                     |
| rs7865618  | 9:22031005     | CDKN2BAS    | A                                            | A                                                     |
| rs1900005  | 10:69998055    | ATOH7       | C                                            | C                                                     |
| rs7072574  | 10:96036306    | PLCE1       | A                                            | A                                                     |
| rs1346     | 11:65337251    | SSSCA1      | A                                            | A                                                     |
| rs4936099  | 11:130280725   | ADAMTS8     | A                                            | C                                                     |
| rs11168187 | 12:48044011    | RPAP3       | A                                            | A                                                     |
| rs10862688 | 12:83922912    | TMTC2       | G                                            | G                                                     |
| rs4901977  | 14:60789176    | SIX1/6      | T                                            | T                                                     |
| rs1345467  | 16:51482321    | SALL1       | G                                            | G                                                     |
| rs6054374  | 20:6578556     | BMP2        | C                                            | C                                                     |
| rs1547014  | 22:29100711    | CHEK2       | C                                            | C                                                     |
| rs301801   | 1:8495945      | RERE        | C                                            | C                                                     |
| rs868153   | 6:122389955    | HSF2        | T                                            | G                                                     |

|           |             |        |   |   |
|-----------|-------------|--------|---|---|
| rs5756813 | 22:38175477 | CARD10 | G | G |
|-----------|-------------|--------|---|---|

180

181 **Table 2. Final 13 SNPs included in Weighted Genetic Risk Score based on high**  
182 **imputation quality ( $R^2$ ) and matching risk alleles**

| SNP         | Gene        | Weight |
|-------------|-------------|--------|
| 1:92077409  | CDC7/TGFBR3 | 0.0002 |
| 3:99131755  | COL8A1      | 0.0337 |
| 9:22031005  | CDKN2BAS    | 0.3245 |
| 10:69998055 | ATOH7       | 0.0852 |
| 10:96036306 | PLCE1       | 0.0207 |
| 12:48044011 | RPAP3       | 0.0523 |
| 12:83922912 | TMTC2       | 0.1488 |
| 14:60789176 | SIX1/6      | 0.1462 |
| 16:51482321 | SALL1       | 0.0544 |
| 20:6578556  | BMP2        | 0.2726 |
| 22:29100711 | CHEK2       | 0.0702 |
| 1:8495945   | RERE        | 0.0966 |
| 22:38175477 | CARD10      | 0.0537 |

183

184 We used the log odds ratio (OR) estimated from the single SNP logistic regression  
185 model adjusted for age, PC-1, and PC-2 to form the GRS. For  $m$  patients, we define  $G_i$   
186 as the number of risk alleles for the  $i$ th SNP, and  $\log OR_i$  as the log OR for the  $i$ th SNP  
187 from the single SNP logistic regression model. The GRS is defined as  $GRS =$   
188  $\sum_{i=1}^m \log OR_i \times G_i$ . A weighted GRS was constructed by multiplying the vertical CDR-  
189 increasing allele by the effect size previously reported.

## 190 **Statistical Analysis**

191 Demographic and baseline clinical variables were obtained from this data set including,  
192 education, smoking, diabetes, body mass index (BMI), cardiovascular disease, diabetic  
193 retinopathy, and hormone therapy randomization. T-tests or Wilcoxon rank sum tests  
194 were used to test associations for continuous variables, and chi-square tests or Fisher's  
195 exact test were used to test associations with categorical variables.

196 We used logistic regression to evaluate the cross-sectional association of the  
197 weighted GRS with large CDR. We used linear regression models to evaluate the  
198 association between weighted GRS and 3MSE scores, and between weighted GRS,  
199 CDR, and 3MSE, both models adjusted for age, education, smoking, diabetes, body  
200 mass index, cardiovascular disease, diabetic retinopathy, and hormone therapy  
201 randomization. Specifically, we investigated models using the previously mentioned  
202 covariates, including an interaction between GRS and CDR, with 3MSE scores as the  
203 outcome of interest. As 3MSE scores were not normally distributed, we used a log-  
204 transformed function of scores,  $\log(102-3MSE)$ . All analyses were conducted using R  
205 (R Core Team (2019). R: URL <https://www.R-project.org/>).

## 206 **Results**

207 Final analyses included 1,196 White women with baseline CDR, demographic and  
208 clinical characteristic data, 3MSE scores, and weighted GRS. The mean age ( $\pm$  SD)  
209 was  $69.60 \pm 3.62$  years. 87 of 1,196 (7.27%) women had large CDR. Table 3 shows the  
210 distribution of the baseline demographic and clinical characteristic variables. Figure 2

211 shows the distribution of GRS by large CDR status. The mean GRS in women with and  
212 without a large CDR was  $1.51 \pm 0.31$  vs  $1.41 \pm 0.36$  (p-value=0.004).

213 **Table 3. Patient Demographic and Clinical Characteristics**

| <b>Variable</b>                                | <b>Summary Statistics</b> |
|------------------------------------------------|---------------------------|
| <b>Number of Patients, n</b>                   | 1196                      |
| <b>Age at Enrollment, Mean (SD) [Min, Max]</b> | 69.6 (3.62) [63,79]       |
| <b>Education, n(%)</b>                         |                           |
| No High School                                 | 50 (4.18)                 |
| High School                                    | 294 (24.58)               |
| Post High School                               | 463 (38.71)               |
| College Graduate                               | 389 (32.53)               |
| <b>Cigarette smoking, n(%)</b>                 |                           |
| Never Smoked                                   | 690 (57.69)               |
| Former Smoker                                  | 440 (36.79)               |
| Current Smoker                                 | 66 (5.52)                 |
| <b>BMI, n(%)</b>                               |                           |
| Underweight                                    | 9 (0.75)                  |
| Normal                                         | 348 (29.1)                |
| Overweight                                     | 412 (34.45)               |
| Obesity Class 1                                | 288 (24.08)               |
| Obesity Class 2                                | 98 (8.19)                 |
| Extreme Obesity                                | 41 (3.43)                 |
| <b>Diabetes, n(%)</b>                          |                           |
| No                                             | 1101 (92.06)              |
| Yes                                            | 95 (7.94)                 |
| <b>Prior Cardiovascular Disease, n(%)</b>      |                           |
| No                                             | 1009 (84.36)              |
| Yes                                            | 187 (15.64)               |
| <b>Diabetic Retinopathy, n(%)</b>              |                           |
| No                                             | 1168 (97.66)              |
| Yes                                            | 28 (2.34)                 |

| <b>Hormone therapy assignment, n(%)</b> |              |
|-----------------------------------------|--------------|
| E-alone intervention                    | 213 (17.81)  |
| E-alone control                         | 240 (20.07)  |
| E+P intervention                        | 369 (30.85)  |
| E+P control                             | 374 (31.27)  |
| <b>Large Cup-to-Disc Ratio, n(%)</b>    |              |
| Without                                 | 1109 (92.73) |
| With                                    | 87 (7.27)    |

214

215 **Fig 2. Comparison of Weighted Genetic Risk Score by Large Optic Nerve Cupping**

216 In the model adjusted for age, education, smoking, diabetes, BMI, cardiovascular  
217 disease, diabetic retinopathy, and hormone therapy randomization, White women with  
218 large CDR had statistically significantly lower 3MSE scores, compared to White women  
219 without large CDR, yielding a predicted mean difference in 3MSE scores of 0.83 (p-  
220 value = 0.007).

221 In a logistic model adjusted for age, PC-1, and PC-2, we found that weighted  
222 GRS was associated with large CDR. The odds of large CDR for a one-unit greater  
223 GRS was 2.30 (95% CI: (1.21, 4.35), p-value = 0.011). In an adjusted linear model,  
224 weighted GRS was not separately associated with 3MSE scores (p-value = 0.964).

225 Additionally, in a linear model adjusted for the baseline demographic and  
226 clinical characteristics, we did not find an interaction between GRS and CDR to be  
227 significantly associated with lower 3MSE scores (p-value=0.478), indicating that the  
228 association of GRS with 3MSE scores does not change depending on CDR status.  
229 However, excluding the interaction term, controlling for GRS, women with large CDR  
230 still had statistically significantly lower 3MSE scores when compared to women without

231 large CDR, yielding a predicted mean difference in 3MSE scores of 0.84 (p-value =  
232 0.007) (Table 4).

233 **Table 4. Linear Regression Model Estimates of 3MSE Scores**

| Variable* | Estimate (95% CI)   | P-value |
|-----------|---------------------|---------|
| GRS       | -0.01 (-0.09, 0.07) | 0.810   |
| Large CDR | 0.15 (0.04, 0.26)   | 0.007   |
| Age       | 0.03 (0.02, 0.04)   | <0.001  |

234 \*Model also adjusts for education, smoking, diabetes, BMI, cardiovascular disease,  
235 diabetic retinopathy, and hormone therapy randomization

236

## 237 Discussion

238 This study represents the first epidemiologic investigation of the effect of GRS for  
239 vertical CDR on the relationship between optic nerve cupping and cognitive function.

240 There are three key findings. First, a higher CDR GRS was associated with increased  
241 odds of large CDR. The odds of large CDR for a one unit increase in GRS was 2.29  
242 (95% CI: (1.21, 4.34), p-value = 0.011). Second, there was no association between the  
243 GRS for CDR and 3MSE. Third, large optic nerve cupping was associated with poorer  
244 cognitive function, independent of the GRS.

245 The optic disc, specifically the CDR, is commonly assessed during ophthalmic  
246 exams to detect and monitor multiple ocular diseases, such as glaucoma. Therefore,  
247 identifying factors that affect the CDR can aid in accurate prediction of eye pathologies.  
248 Epidemiological studies have identified that high IOP and low BMI are associated with  
249 variation in CDR.<sup>13-15</sup> CDR is an optic nerve head structural biomarker with a strong  
250 genetic component (heritability estimates range from 48% to 66%).<sup>16-17</sup> GWAS studies

251 have shown specific loci associated with CDR, but each locus has limited predictive  
252 power. We used a GRS based on previous work by Springelkamp et al. to identify the  
253 aggregate effect that common genetic variants have on CDR. We found an association  
254 between a higher optic nerve GRS and the risk of large CDR.

255 A study of Lantinx individuals also found a significant association between  
256 vertical CDR and a GRS for vertical CDR, also using SNPs from GWAS data, and  
257 controlling for age, gender, central corneal thickness, IOP, and education.<sup>18</sup> They found  
258 that a weighted GRS improved the discriminatory ability for POAG, with an AUC of  
259 0.735 (95% CI: [0.701, 0.768]).<sup>18</sup> In the present study, a higher GRS was associated  
260 with a higher odds of large CDR, after adjusting for age, PC-1, and PC-2.

261 Previous studies also investigated GRS in relation to cognitive impairment.<sup>19</sup>  
262 For instance, Wollam et al. constructed a GRS based on risk alleles and performed a  
263 neuropsychiatric evaluation to determine cognitive status. Using a logistic regression,  
264 they showed that a one unit increase in GRS was associated with a nearly 4-fold  
265 increased risk of cognitive impairment (OR = 3.824, P = .013).<sup>19</sup> Our work did not show  
266 a relationship between GRS of CDR and cognitive decline. However, we utilized  
267 cognitive function at a baseline 3MSE measurement. The data collection for this study  
268 lasted several years with years of longitudinal data measuring cognitive function. While  
269 3MSE measurements were available over time, CDR classification was only available at  
270 one time point. It would be interesting to obtain longitudinal images of CDR to  
271 investigate the relationship between the GRS and MSE measurements over time.



272 Our study has notable strengths and limitations. We used a large, well  
273 characterized cohort of women from WHISE and WHIMS who contributed not only optic  
274 nerve cupping data but also variables associated with optic nerve cupping and cognitive  
275 function. This study builds directly on prior work in this cohort, using the 3MSE scores, a  
276 reliable measure of global cognitive function, with very high interrater reliability (0.98),  
277 internal consistency (0.91), and test-retest reliability (0.78), when measured in older  
278 adults.<sup>11, 20</sup> Although, the WHISE and WHIMS included women from a variety of racial  
279 backgrounds, the constructed GRS comprised of genetic variants validated only in  
280 White individuals and therefore the study was limited to White individuals. The inclusion  
281 of all race/ethnicity groups is of utmost importance. In this study, our analysis was  
282 limited to White participants for the two main reasons. First, the majority of the WHI  
283 participants are from White race/ethnicity (86%). In addition, the number of participants  
284 that were non-white with CDR was limited, making it challenging to perform subset  
285 analyses or to adjust for race/ethnicity. Secondly, the meta- analysis, which included the  
286 target SNPs, was primarily based on a population of European ancestry. In future  
287 studies, the inclusion of multi-racial/ethnicity is needed as results in White women are  
288 not generalizable to men and other racial groups. Future studies should validate these  
289 findings in other racial groups. Our approach to computing the GRS was based on prior  
290 work but may have been limited because we did not independently identify SNPs  
291 associated with large CDR. The SNPs previously identified were associated with a  
292 continuous measure of CDR while we used a binary CDR measure, which may have  
293 decreased the power to detect an effect of each SNP individually. Additional  
294 approaches involve the computation of a genetic risk score for cognitive function. In our

295 future work, we plan to add detailed grading of the optic nerve and vascular analysis.

296 Lastly, in the time since data collection, more CDR SNPs have been identified.<sup>21</sup> A

297 larger CDR SNP panel might yield different results.

## 298 **Conclusions**

299 In conclusion, the CDR GRS and structural optic nerve biomarkers have  
300 potential to be powerful biomarkers in medicine and public health efforts. Specifically,  
301 the GRS may identify populations at risk for pathologies such as high CDR and  
302 cognitive decline. This study confirmed that a CDR GRS can predict large CDR, and the  
303 large optic nerve cupping was associated with cognitive decline, independently of the  
304 GRS for the CDR. Future research examining these biomarkers and their clinical utility  
305 with a long-term follow up is warranted.

306

307

308

309

310

311

312

313

## 314 **Acknowledgments**

315 Dr. Hallak and Dr. Vajaranant contributed equally as co-senior authors

316 **a. Funding/Support:** EY022949 National Eye Institute, Maryland (TSV);  
317 Bright Focus Foundation grant M2019155, Maryland (JH): an unrestricted Grant  
318 for Research to Prevent Blindness, New York (JH, TSV); P30 Core Grant for  
319 Vision Research (2P30EY001792), Maryland. EY015474 National Eye Institute  
320 (LRP): Challenge Grant from Research to Prevent Blindness, New York (LRP).

### 321 **b. Financial Disclosures:**

- 322 •RR – current employee of Janssen
- 323 •LRP – Consultant: Eyenovia, Nicox, Twenty-twenty, Emerald Biosciences.  
324 Support: NIH/NEI
- 325 •PMM – Consultant: Astellas, AbbVie, Balchem, Pfizer
- 326 •JAH – research grant: Bright Focus Foundation

327 **c. Conflict of Interests:** none (SK, MAE, SRR, BEK, SMM, MNH, TSV)

328

329

330

331

332

## 333 **References**

- 334 <sup>1</sup> Quigley HA, Broman AT. The number of people with glaucoma worldwide in 2010 and  
335 2020. *Br J Ophthalmol.* 2006; 90(3): 262-7
- 336 <sup>2</sup> Klein BE, Klein R, Sponsel WE, Franke T, Cantor LB, Martone J, Menage MJ,  
337 Prevalence of glaucoma. The beaver dam eye study. *Ophthalmology*, 1992, 99(10),  
338 1499-1504.
- 339 <sup>3</sup> Millar WJ. Vision problems among seniors. *Health Rep.*, 2004, 16(1), 45-49.
- 340 <sup>4</sup> Mancino R, Martucci A, Cesareo M, et al. Glaucoma and Alzheimer Disease: One  
341 Age-Related Neurodegenerative Disease of the Brain. *Current Neuropharmacology*,  
342 2018, 16, 971-7.
- 343 <sup>5</sup> Carelli V, La Morgia C, Ross-Cisneros F, et al. Optic neuropathies: the tip of the  
344 neurodegeneration iceberg. *Hum Mol Genet.* 2017; 26(R2): 139-150.
- 345 <sup>6</sup> Chandra V, Bharucha NE, Schoenberg BS. Conditions associated with Alzheimer's  
346 disease at death: case-control study. *Neurology.* 1986; 36(2):209–211.
- 347 <sup>7</sup> Bayer AU, Ferrari F, Erb C. High occurrence rate of glaucoma among patients with  
348 Alzheimer's disease. *Eur Neurol.* 2002;47(3):165–168.
- 349 <sup>8</sup> Ho W.L, Leung Y, Tsang A.W, So K.F, Chiu K, Chang R.C. Review: tauopathy in the  
350 retina and optic nerve: does it shadow pathological changes in the brain? *Mol. Vis.*,  
351 2012, 18, 2700-2710.
- 352 <sup>9</sup> Coppola G, Di Renzo A, Ziccardi L, Martelli F, Fadda A, Manni G, Barboni P, Pierelli F,  
353 Sadun AA, and Parisi V. (2015) Optical coherence tomography in Alzheimer's disease:  
354 a meta-analysis. *PLoS One*, 10, e0134750

355 <sup>10</sup> Quigley HA., Dunkelberger GR. and Green WR. (1988) Chronic human glaucoma  
356 causing selectively greater loss of large optic nerve fibers. *Ophthalmology*, 95, 357–  
357 363.

358 <sup>11</sup> Vajaranant TS, Hallak J, Espeland MA, et al. An Association Between Large Optic  
359 Nerve Cupping and Cognitive Function. *Am J Ophthalmol*. 2019; 2016: 40-7.

360 <sup>12</sup> Springelkamp H, Höhn R, Mishra A, Hysi PG, Khor CC, Loomis SJ, ... & Hammond  
361 CJ. (2014). Meta-analysis of genome-wide association studies identifies novel loci that  
362 influence cupping and the glaucomatous process. *Nature communications*, 5(1), 1-7.

363 <sup>13</sup> Kim YJ, Kim JM, Shim SH, et al. Associations between Optic Cup-to-disc Ratio and  
364 Systemic Factors in the Healthy Korean Population. *Korean J Ophthalmol*. 2015;  
365 29(5):336–43

366 <sup>14</sup> Amerasinghe N, Wong TY, Wong WL, et al. Determinants of the optic cup to disc ratio  
367 in an Asian population: the Singapore Malay Eye Study (SiMES). *Arch Ophthalmol*.  
368 2008; 126(8):1101–8

369 <sup>15</sup> Quigley HA, West SK, Rodriguez J, et al. The prevalence of glaucoma in a  
370 population-based study of Hispanic subjects: Proyecto VER. *Arch Ophthalmol*. 2001;  
371 119(12):1819–26.

372 <sup>16</sup> Klein BE, Klein R, Lee KE. Heritability of risk factors for primary open-angle  
373 glaucoma: the Beaver Dam Eye Study. *Invest Ophthalmol Vis Sci*. 2004; 45(1):59–62.

374 <sup>17</sup> Charlesworth J, Kramer PL, Dyer T, et al. The path to open-angle glaucoma gene  
375 discovery: endophenotypic status of intraocular pressure, cup-to-disc ratio, and central  
376 corneal thickness. *Invest Ophthalmol Vis Sci*. 2010; 51(7):3509–14.

377 <sup>18</sup> Nannini DR, Kim H, Fan F, Gao X. Genetic risk score is associated with vertical cup-  
378 disc ratio and improves prediction of primary open angle glaucoma in Latinos.

379 *Ophthalmology*. 2018; 125(6): 815-21.

380 <sup>19</sup> Wollam ME, Weinstein AM, Saxton JA, et al. Genetic Risk Score Predicts Late-Life  
381 Cognitive Impairment. *J Aging Res*. 2015; 267062.

382 <sup>20</sup> Bassuk SS, & Murphy JM. (2003). Characteristics of the modified mini-mental state  
383 exam among elderly persons. *Journal of clinical epidemiology*, 56(7), 622-628.

384 <sup>21</sup> Han X, Steven K, Qassim A, Marshall HN, Bean C, Tremeer M. ... & MacGregor S.  
385 (2021). Automated AI labeling of optic nerve head enables insights into cross-ancestry  
386 glaucoma risk and genetic discovery in > 280,000 images from UKB and CLSA. *The*  
387 *American Journal of Human Genetics*.

388

389

390

391

392

393

394

395

396

bioRxiv preprint doi: <https://doi.org/10.1101/2021.09.30.462651>; this version posted September 30, 2021. The copyright holder for this preprint (which was not certified by peer review) is the author/funder, who has granted bioRxiv a license to display the preprint in perpetuity. It is made available under aCC-BY 4.0 International license.

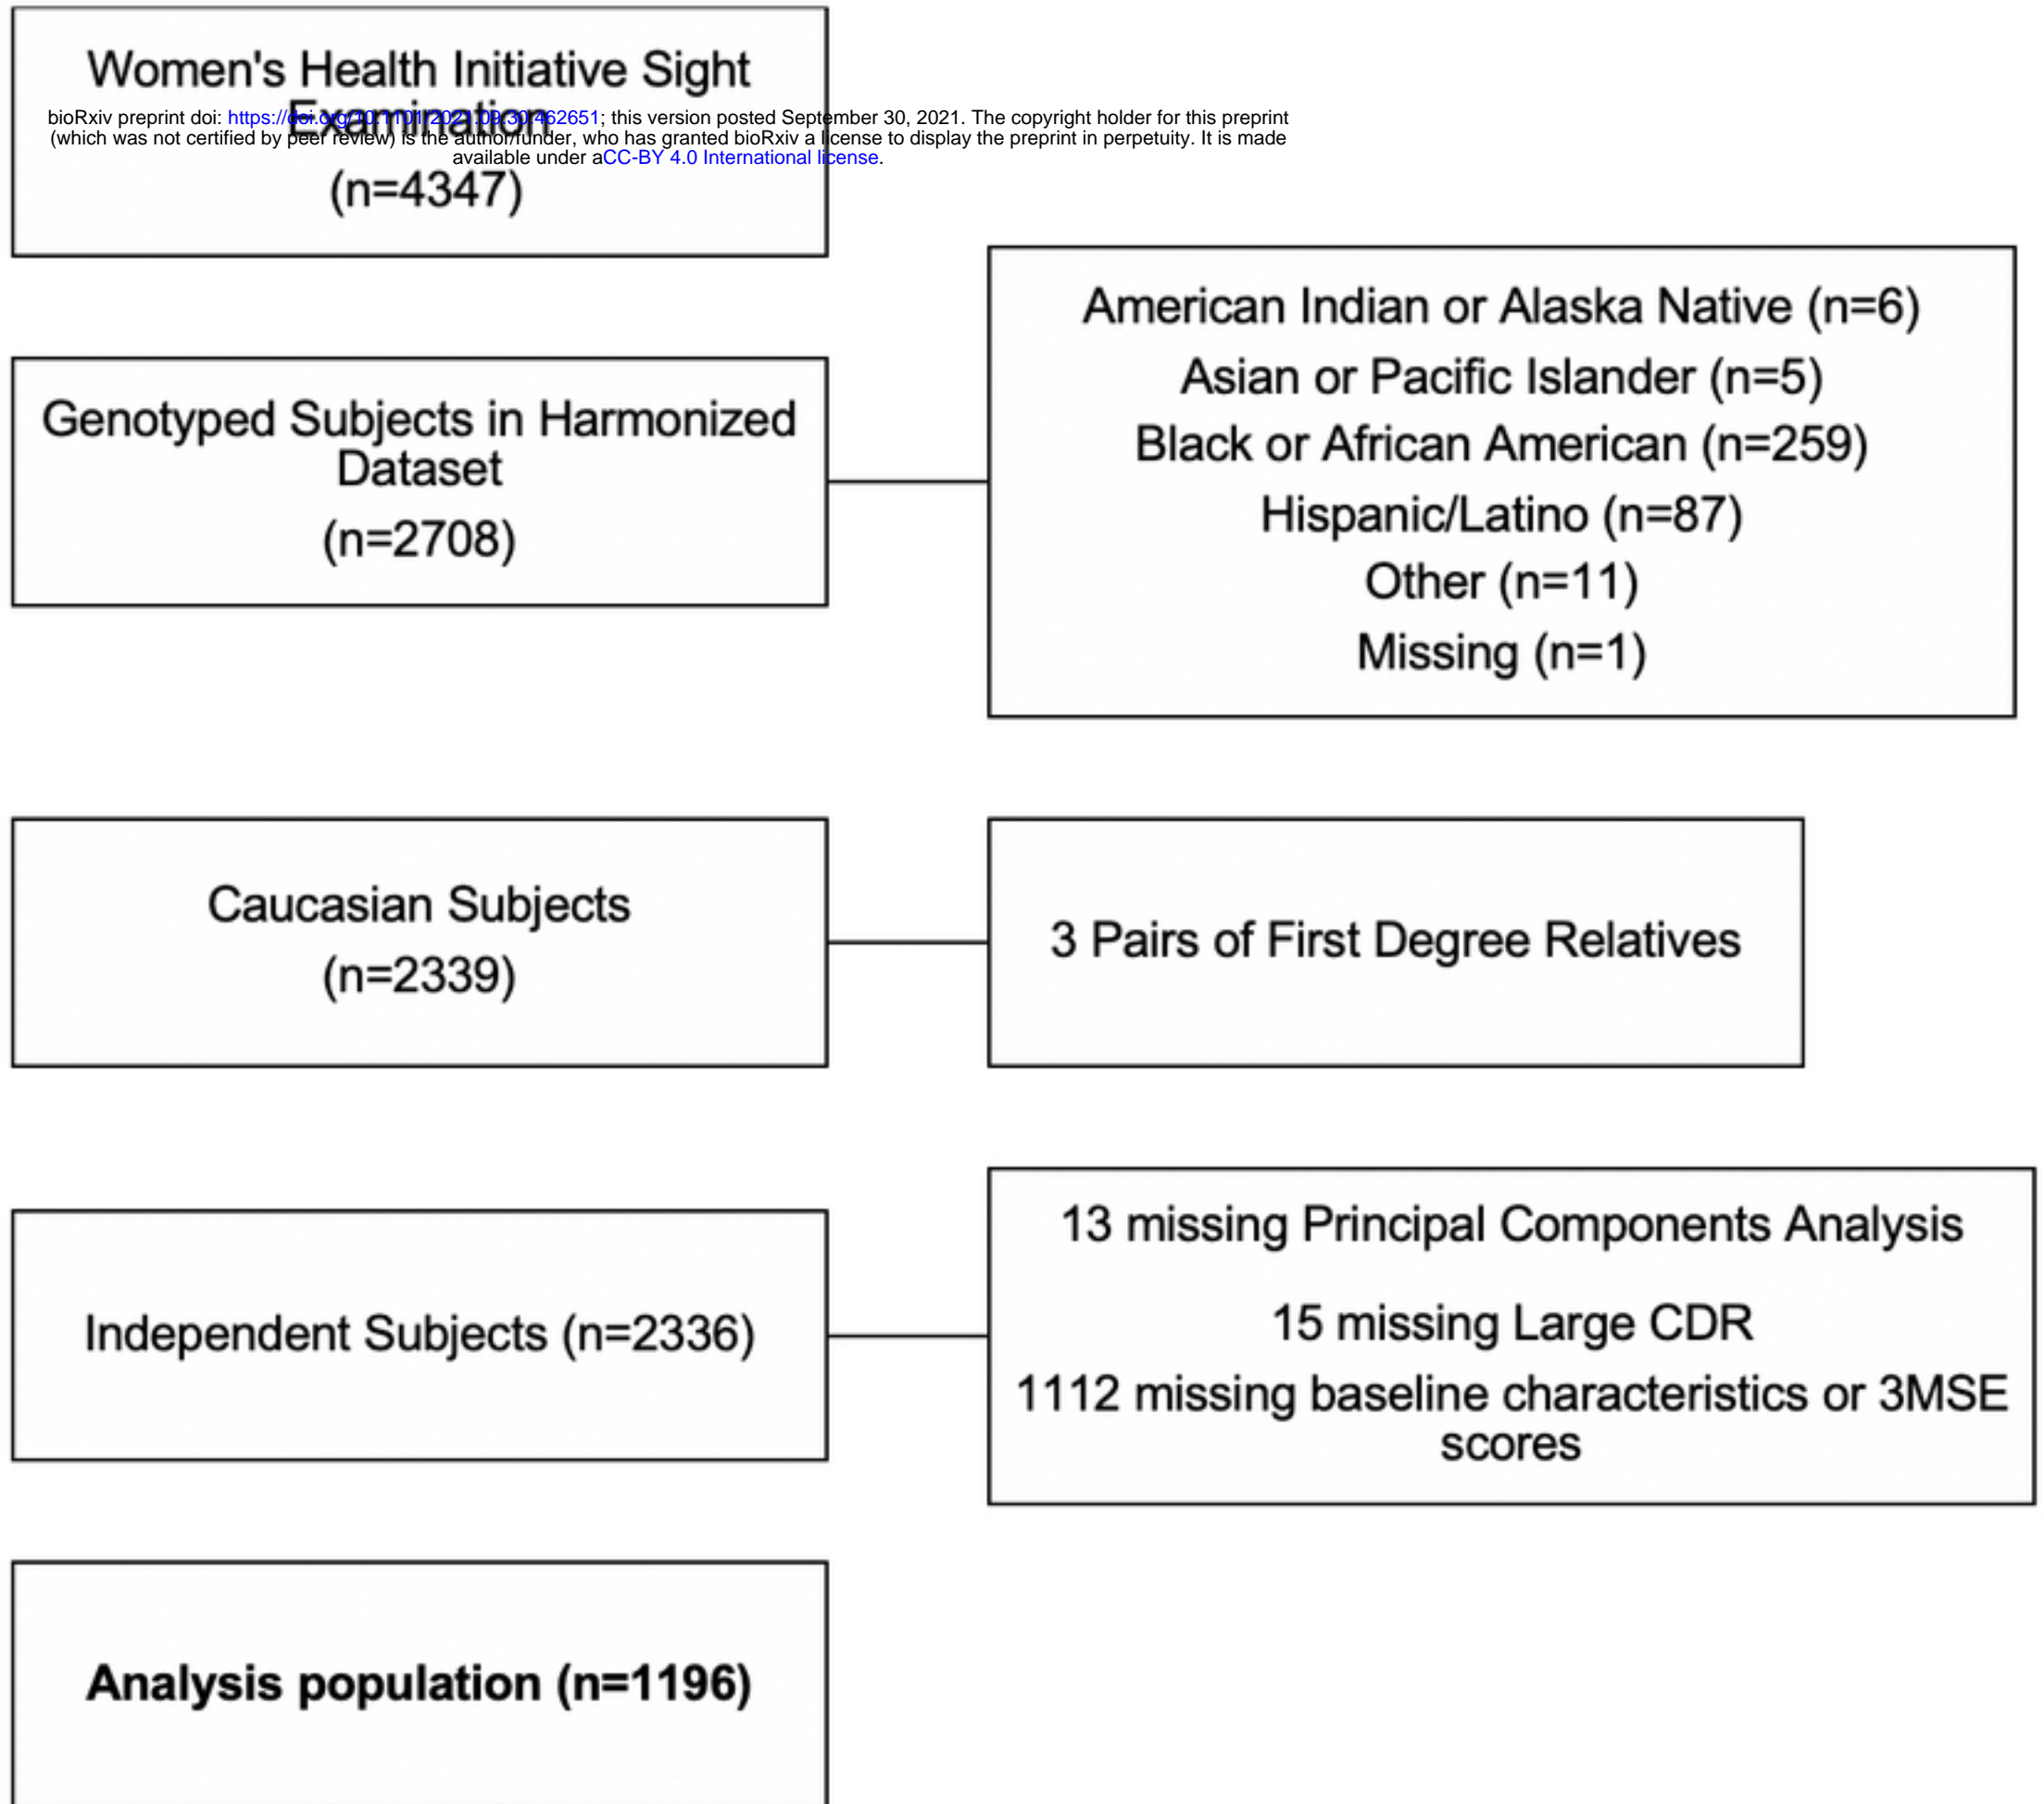

Figure 1

# GRS by Cup-to-Disc Ratio

bioRxiv preprint doi: <https://doi.org/10.1101/2021.09.30.462651>; this version posted September 30, 2021. The copyright holder for this preprint (which was not certified by peer review) is the author/funder, who has granted bioRxiv a license to display the preprint in perpetuity. It is made available under aCC-BY 4.0 International license.

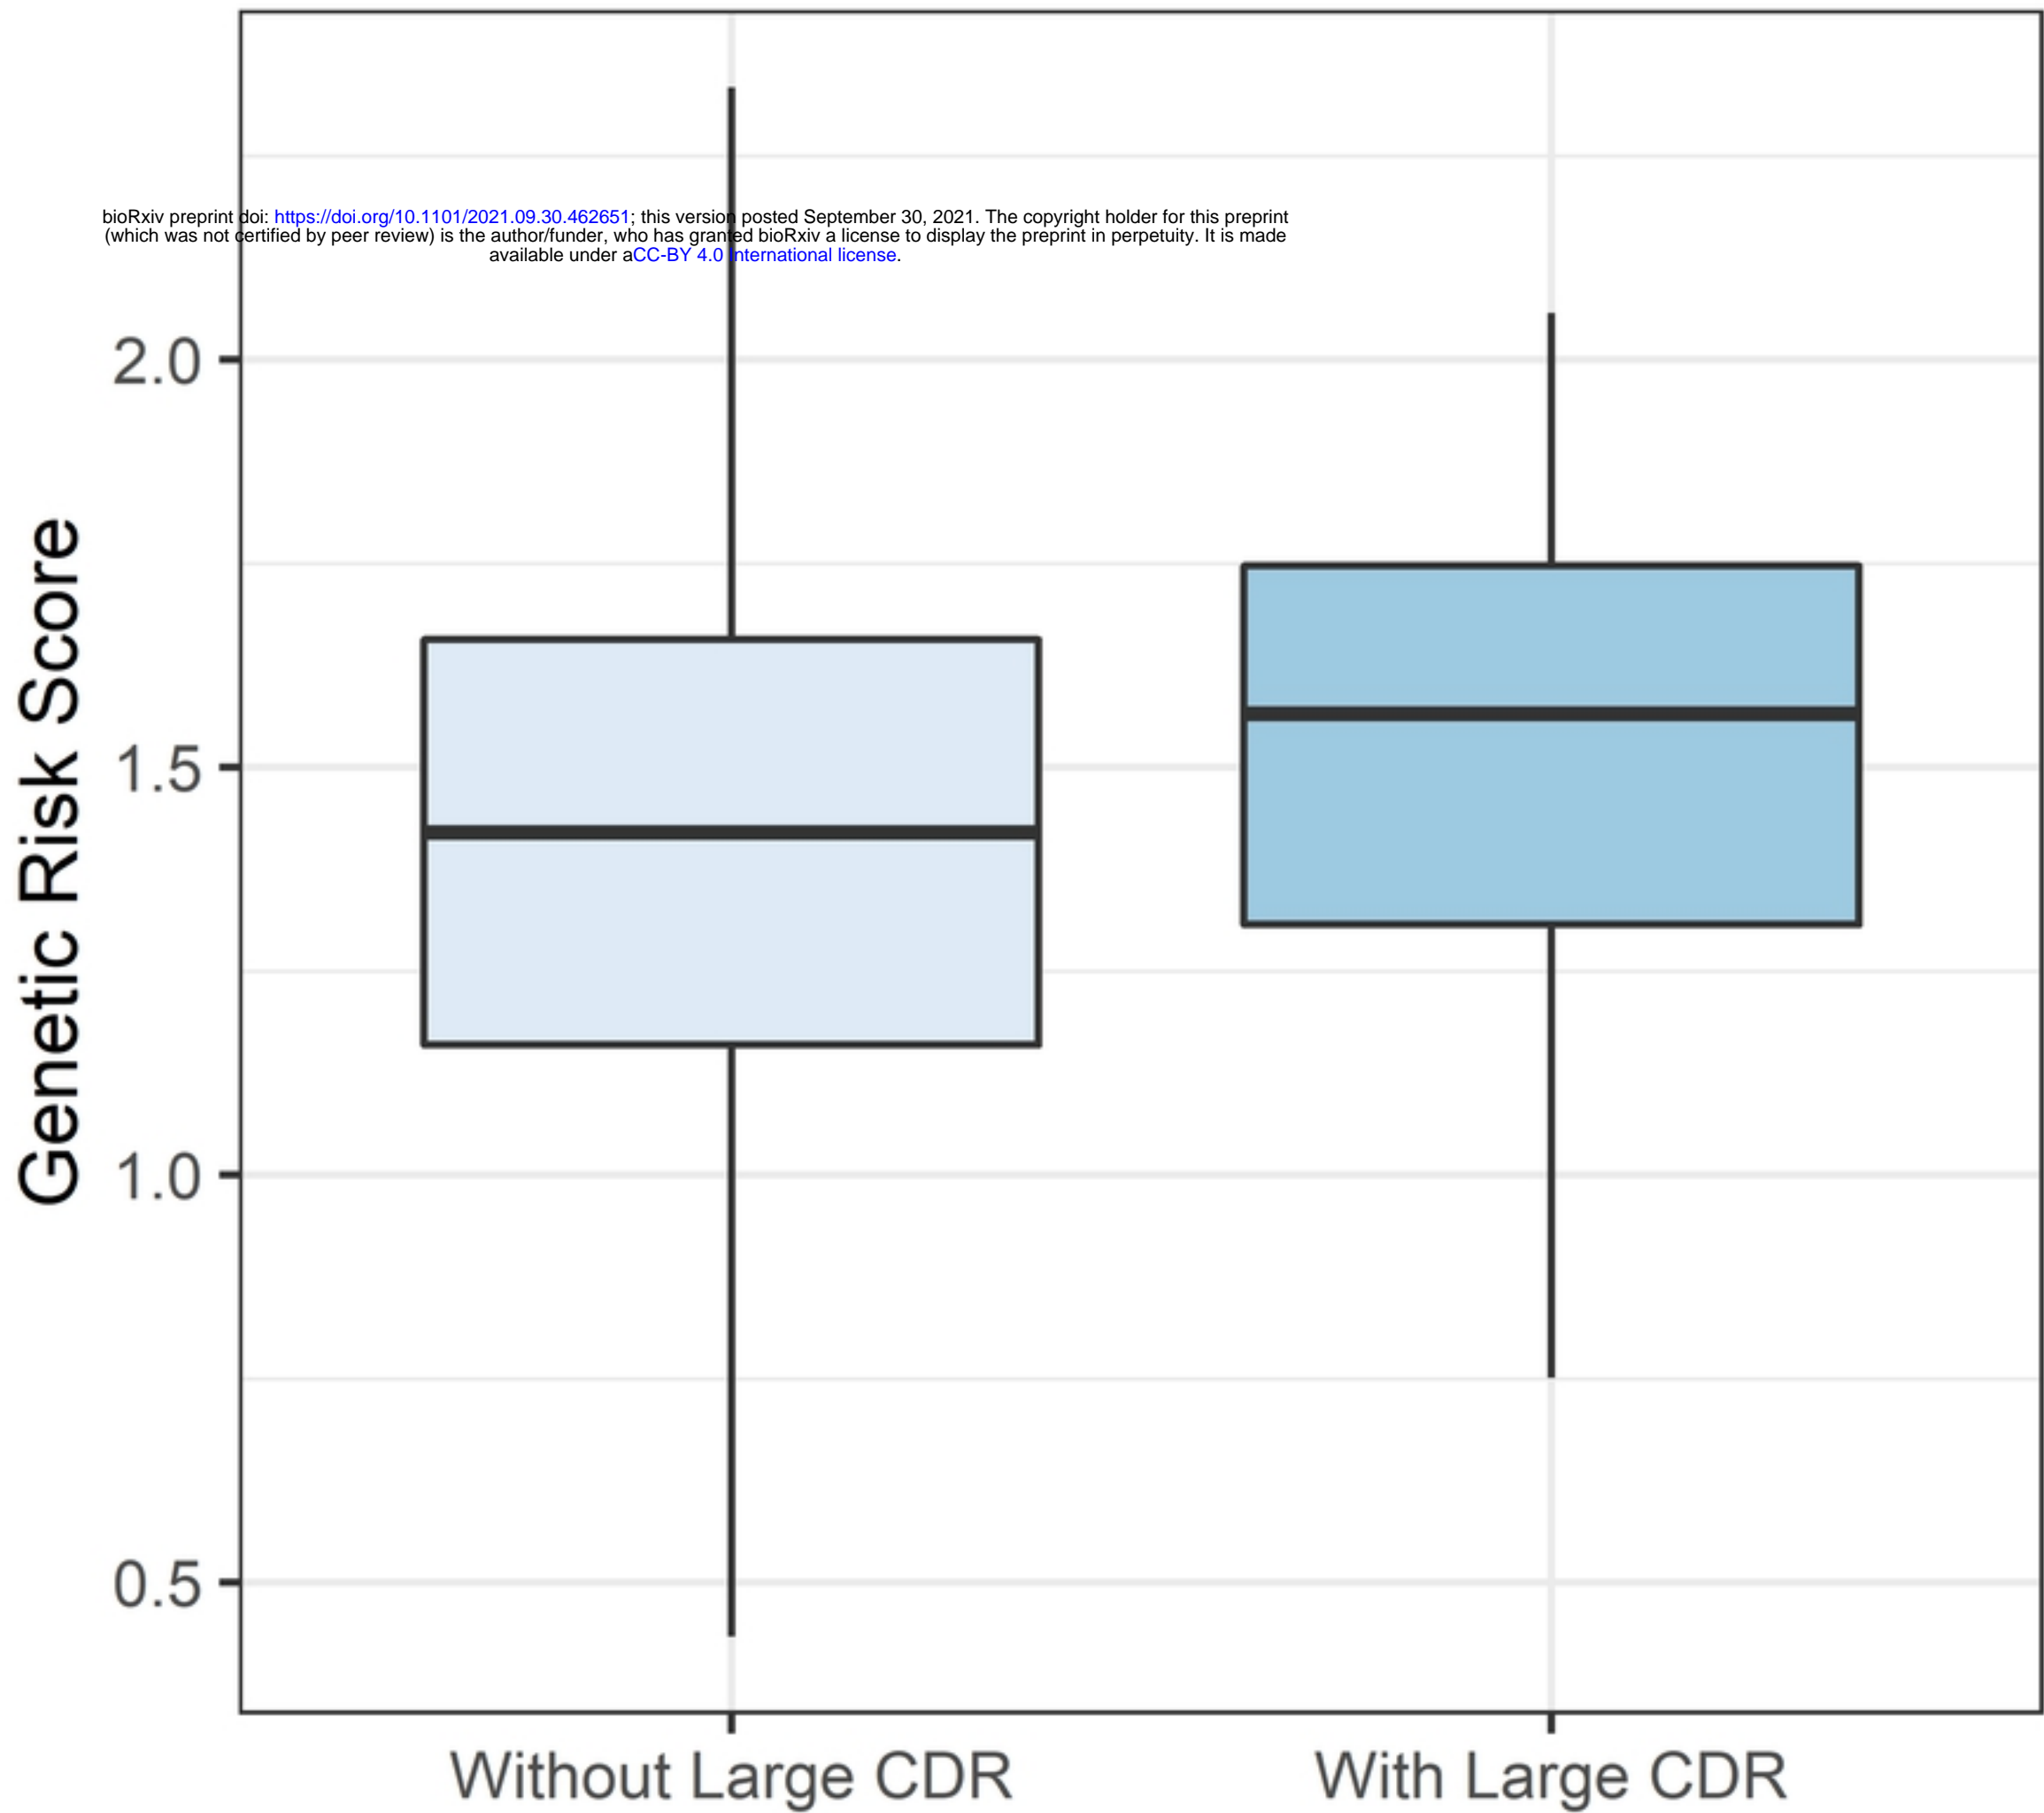

Figure 2
